# Supplementary material for: Inducing endoplasmic reticulum stress in cancer cells using graphene oxide-based nanoparticles
Source: Royal Society of Chemistry journal article supplement (doi:10.1039/d0na00338g), 2020-01-01
Supplement: d0na00338g1.pdf [file d0na00338g1.pdf]

## Supporting Information

### Inducing Endoplasmic Reticulum Stress in Cancer Cells by Graphene Oxide-Based Nanoparticles

Shalini Pandey<sup>a</sup>, Aditi Nandi<sup>a</sup>, Sudipta Basu<sup>b, \*</sup>, Nirmalya Ballav<sup>a, \*</sup>

a. Department of Chemistry, Indian Institute of Science Education and Research (IISER), Pune, Dr. Homi Bhabha Road, Pashan, Pune, Maharashtra, India, 411008

b. Discipline of Chemistry, Indian Institute of Technology (IIT) Gandhinagar, Palaj, Gandhinagar, Gujarat, India, 382355.

Email: [Sudipta.basu@iitgn.ac.in](mailto:Sudipta.basu@iitgn.ac.in) and [nballav@iiserpune.ac.in](mailto:nballav@iiserpune.ac.in)

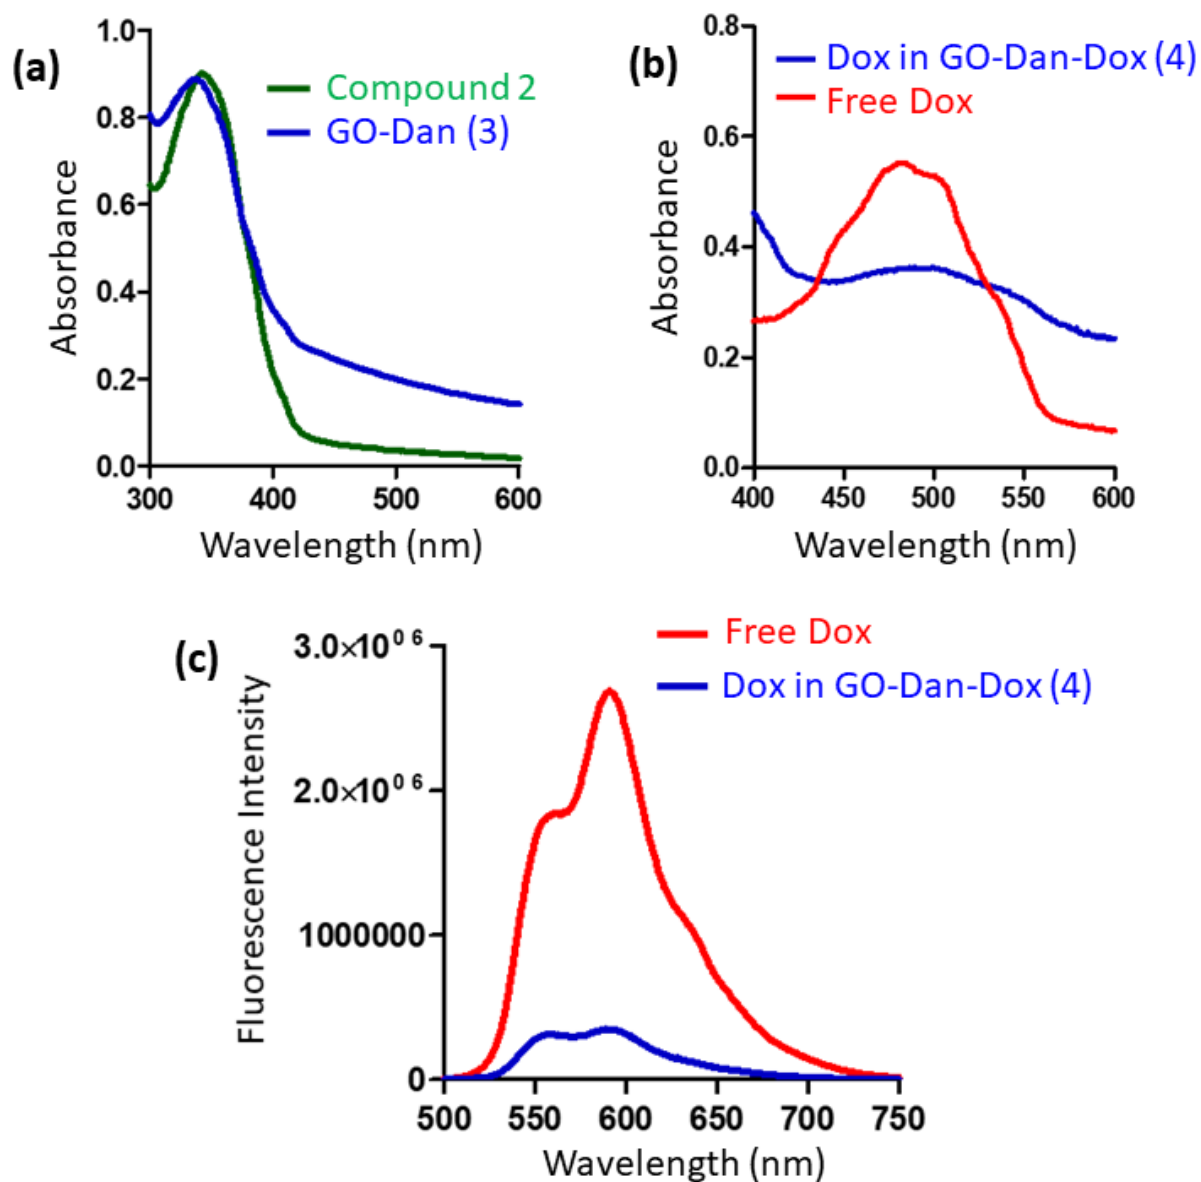

**Fig. S1:** (a, b) UV-Vis spectra confirming the presence of dansyl and dox. (c) Fluorescence emission spectra exhibiting the stacking of dox on GO surface.

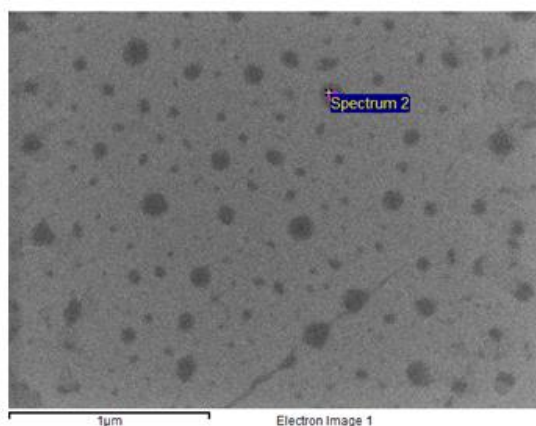

| Element | Weight % | Atomic % |
|---------|----------|----------|
| C       | 56.68    | 83.79    |
| O       | 12.04    | 13.37    |
| Pt      | 31.27    | 2.85     |

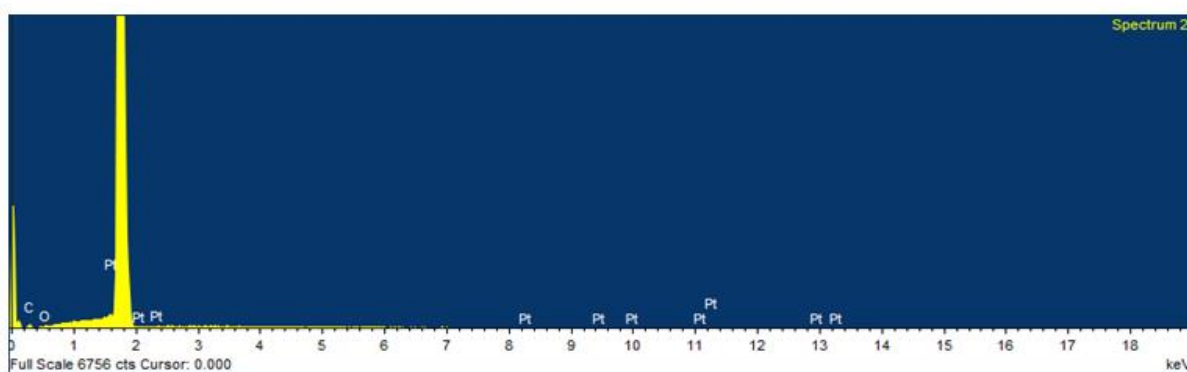

**Fig. S2:** EDAX of ER-GO-NPs from FESEM confirming the presence of cisplatin.

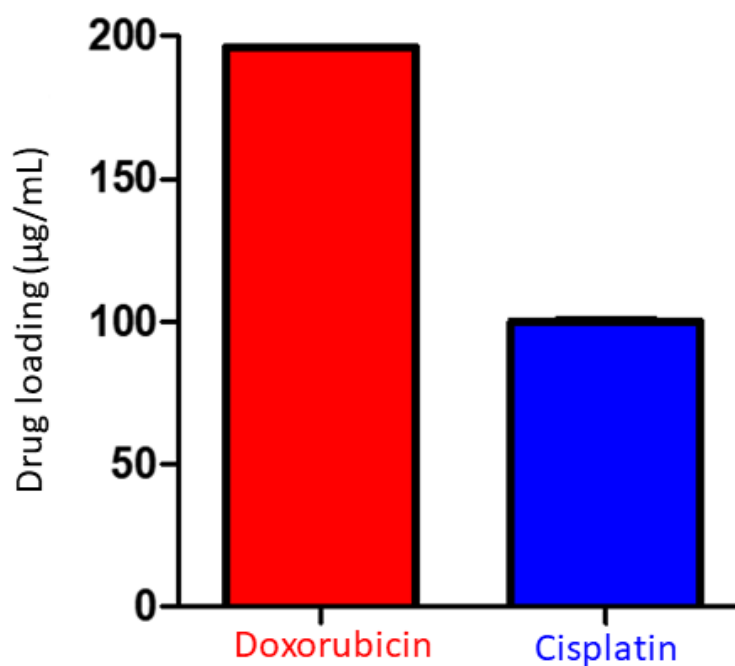

**Fig. S3:** Drug loading of dox and cisplatin in ER-GO-NPs.

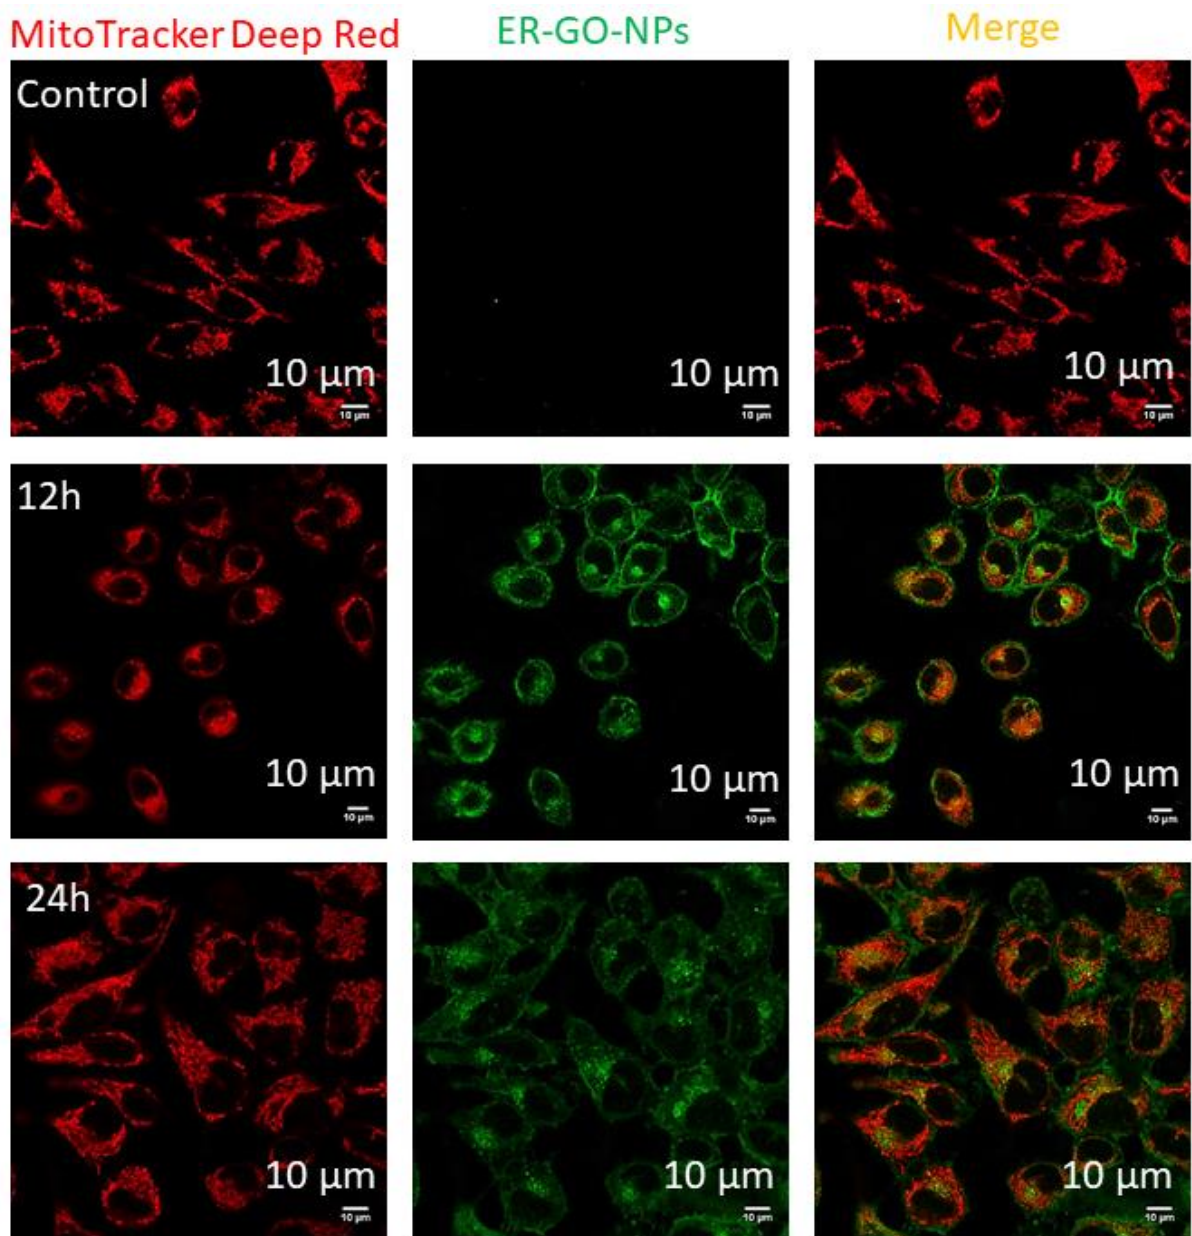

**Fig. S4:** CLSM images of HeLa cells at 12 h and 24 h post incubation with ER-GO-NPs. Mitochondria were stained with red fluorescent Mito Tracker Deep Red. Scale bar = 10 μm.

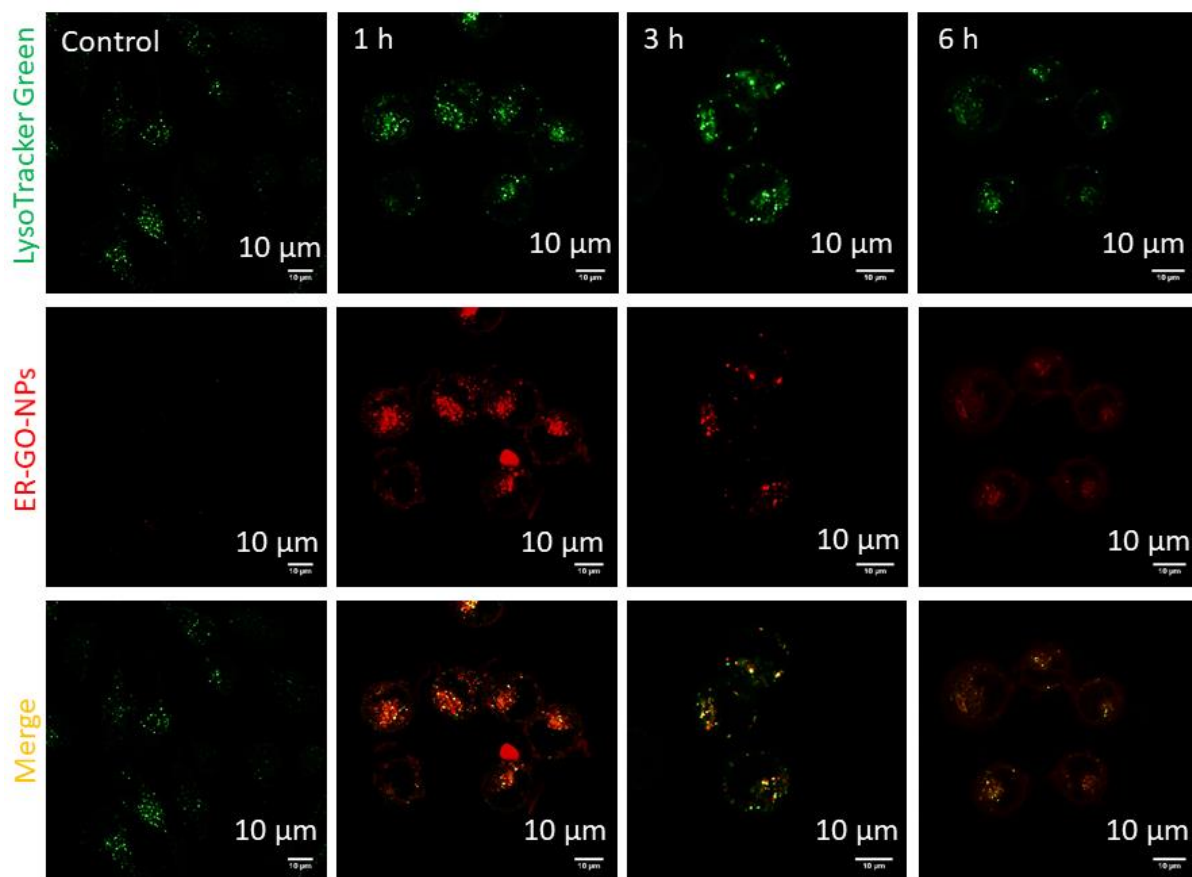

**Fig. S5:** CLSM images of HeLa cells at 1 h, 3 h and 6 h post incubation with ER-GO-NPs. Lysosomes were stained with LysoTracker Green DND-26 (green fluorescent). Scale bar = 10 μm.

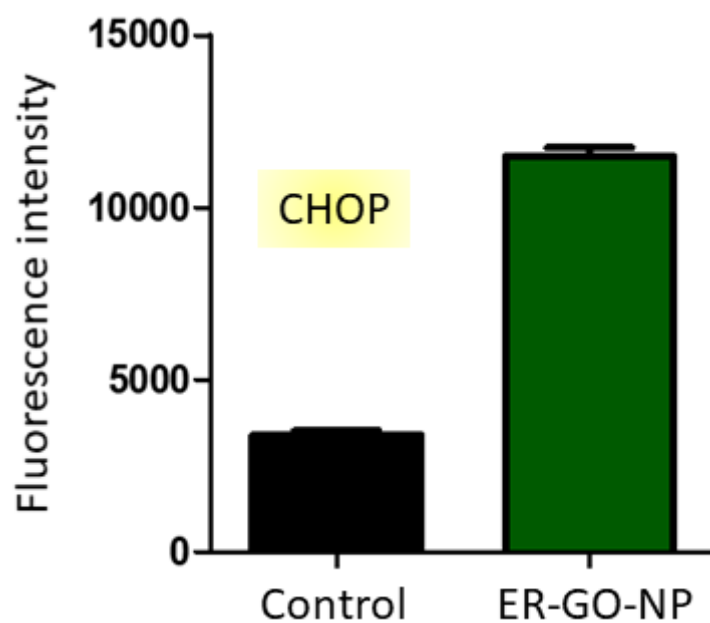

**Fig. S6:** Quantification of CHOP expression in HeLa cells from confocal microscopy.

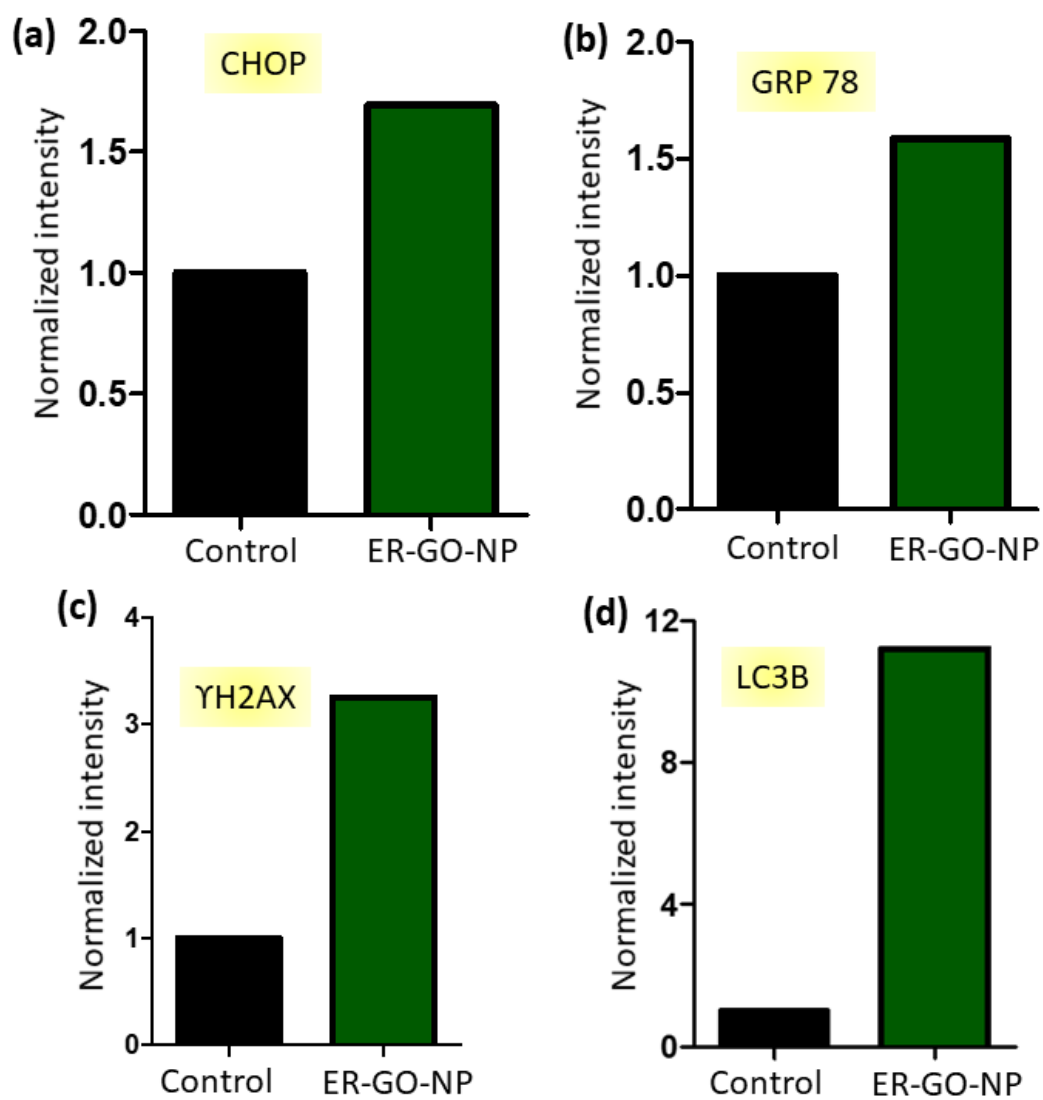

**Fig. S7:** Quantification of (a) CHOP (b) GRP 78 (c)  $\gamma$ H2AX (d) LC3B from western blot analysis after treatment of HeLa cells with ER-GO-NPs.

| Treatment Time                    |                                    | 3 h        | 6 h        | 12 h       | 24 h       |
|-----------------------------------|------------------------------------|------------|------------|------------|------------|
| Image Channels                    |                                    | C1 (red)   | C1 (red)   | C1 (red)   | C1 (red)   |
|                                   |                                    | C3 (green) | C3 (green) | C3 (green) | C3 (green) |
| Pearsons' Correlation Coefficient |                                    | 0.7264     | 0.8668     | 0.7371     | 0.8619     |
| Manders Coefficients              | M1 (fraction of C1 overlapping C3) | 0.9234     | 0.9764     | 0.9551     | 0.9776     |
|                                   | M2 (fraction of C3 overlapping C1) | 0.9561     | 0.9736     | 0.9744     | 0.9791     |

**Table S1:** Quantification of co-localization of ER-GO-NPs in ER of HeLa cells at 3 h, 6 h, 12 h and 24 h from CLSM.

| Treatment Time                    |                                    | 12 h       | 24 h       |
|-----------------------------------|------------------------------------|------------|------------|
| Image Channels                    |                                    | C1 (red)   | C1 (red)   |
|                                   |                                    | C3 (green) | C3 (green) |
| Pearsons' Correlation Coefficient |                                    | 0.4697     | 0.2188     |
| Manders Coefficients              | M1 (fraction of C1 overlapping C3) | 0.3852     | 0.3151     |
|                                   | M2 (fraction of C3 overlapping C1) | 0.4217     | 0.0225     |

**Table S2:** Quantification of co-localization of ER-GO-NPs in mitochondria of HeLa cells at 12 h and 24 h from CLSM.

| Treatment Time                    |                                    | 1 h        | 3 h        | 6 h        |
|-----------------------------------|------------------------------------|------------|------------|------------|
| Image Channels                    |                                    | C1 (red)   | C1 (red)   | C1 (red)   |
|                                   |                                    | C3 (green) | C3 (green) | C3 (green) |
| Pearsons' Correlation Coefficient |                                    | 0.4132     | 0.8206     | 0.2966     |
| Manders Coefficients              | M1 (fraction of C1 overlapping C3) | 0.5733     | 0.9771     | 0.6659     |
|                                   | M2 (fraction of C3 overlapping C1) | 0.6501     | 0.9674     | 0.7361     |

**Table S3:** Quantification of co-localization of ER-GO-NPs in lysosomes of HeLa cells at 1 h, 3 h and 6 h from CLSM.
